# Supplementary material
Source: HighWire-hosted journal article supplement (https://bmjopen.bmj.com/content/12/5/e055899)
Supplement: inline-supplementary-material-1 [file inline-supplementary-material-1.pdf]

## Supplementary file

**Table 1** Summary of key functions of the mini-app prototype

| Key functions                                | Intervention objectives                                                                                                                                                                                                | Intervention strategies                                                                                          |                                                                                  |                                                                                                                                                          |                                                                                                                                                                                 |
|----------------------------------------------|------------------------------------------------------------------------------------------------------------------------------------------------------------------------------------------------------------------------|------------------------------------------------------------------------------------------------------------------|----------------------------------------------------------------------------------|----------------------------------------------------------------------------------------------------------------------------------------------------------|---------------------------------------------------------------------------------------------------------------------------------------------------------------------------------|
|                                              |                                                                                                                                                                                                                        | Information                                                                                                      | Motivation                                                                       | Behavioral Skills                                                                                                                                        | Mental Health                                                                                                                                                                   |
| <b>Mini-classroom</b>                        | Build knowledge and navigation skills around local HIV care system, enhance interest and motivation to use PrEP, and increase self-efficacy in HIV/STI prevention strategies; Improve mental health management skills. | Educational materials in multimedia forms, including text, videos, and graphics.                                 | Real stories of PrEP users; Positive meanings of using PrEP and HIV/STI testing. | List local PrEP and other HIV/STI care providers and contact information; Tips for safe sex, condom use, and PrEP initiation, adherence, and management. | Links to local support groups and mental health care resources.<br><br>Self-management for mental health.<br><br>Coping with stigma and discrimination against LGBTQ community. |
| <b>Online counseling</b>                     | Enable MSM to describe their feelings or concerns related to HIV, sexual health or this intervention study, and help them make healthy decisions.                                                                      | Answer questions about HIV, STI, PrEP, and/or other health topics, and provide additional information if needed. | Tailored health advice regarding PrEP use.                                       | Referral to the HIV/PrEP clinic at the study hospital, or other healthcare providers based on individual needs.                                          | Listen to their needs, and refer to local support groups or mental health care resources, if necessary.                                                                         |
| <b>Home-based HIV/syphilis test ordering</b> | Establish individual habit of routine testing for HIV and syphilis.                                                                                                                                                    | Information about how to complete the home-based test kit.                                                       | Provides a cue to action and removes barrier of in-person testing and stigma.    | An HIV/syphilis home-based test kit ordering system.                                                                                                     |                                                                                                                                                                                 |
| <b>User profile center</b>                   | Allow participants to monitor their HIV/syphilis testing behaviors.                                                                                                                                                    |                                                                                                                  |                                                                                  | A profile page to manage orders of HIV/syphilis test kits and keep a record of test results.                                                             |                                                                                                                                                                                 |

**Table 2** Main topics in the in-depth interview guide in Phase 1

| Topic                                                             | Description                                                                                                                                                                 | Sample probes                                                                                                                                                                                              |
|-------------------------------------------------------------------|-----------------------------------------------------------------------------------------------------------------------------------------------------------------------------|------------------------------------------------------------------------------------------------------------------------------------------------------------------------------------------------------------|
| <b>HIV/STI knowledge &amp; experience</b>                         | Understanding or knowledge of HIV/STI, HIV/STI testing experience, experience with the local HIV/STI prevention & care system.                                              | What do you know about HIV/STI?<br>What do you think about the local HIV prevention and care system?<br>What do you know about PEP and your experience with it, if any?                                    |
| <b>PrEP knowledge and attitudes</b>                               | Understanding of PrEP, and attitudes, including acceptability and willingness of using PrEP to prevent HIV, pre- and post- PrEP attitudes for PrEP-experienced individuals. | What do you know about Pre-Exposure Prophylaxis (PrEP)?<br>Have you ever heard any people you know are taking PrEP?<br>How do you think PrEP have or could have an impact on your sexual health?           |
| <b>PrEP experience</b><br>(for current & intermittent users only) | Narrative of PrEP using experience                                                                                                                                          | What do you think about your PrEP using experience? (probe for motivations to start PrEP, experience with PrEP refilling, cost, side effects, adherence/discontinuation, others' attitudes and/or support) |
| <b>Barriers to PrEP use/continued use</b>                         | Perceived barriers to access, use, and manage PrEP care, and suggestions for PrEP-scale in China                                                                            | Have you ever considered using PrEP?<br>(If Yes) How would you think that will help you?<br>(If not) would you please tell me about your concerns?                                                         |
| <b>Biomedical prevention strategies</b>                           | Experience or perceptions of using biomedical strategies to prevent diseases.                                                                                               | What do you think about taking medicines for preventive purpose, like using PrEP to prevent HIV?                                                                                                           |
| <b>Health beliefs and stress due to COVID-19</b>                  | Experience of the COVID-19 pandemic and how it has influenced health beliefs, views on preventive medicine, and mental health                                               | What do you think about the COVID-19 pandemic has changed your thoughts of health, if any?<br>How have you been since the outbreak of COVID-19?                                                            |
| <b>Mini-app usability test</b>                                    | Feedback on the mini-app design, contents and ease of use.                                                                                                                  | How was your overall experience with the mini app?<br>How did you think the app meet your needs/expectations?                                                                                              |
|                                                                   | Suggestions on app refinement based on the current structure.                                                                                                               | If you were able to redesign this feature, what changes would you make?<br>What other contents could be added to make the app more useful or engaging to you?                                              |

Note: for people who have never heard of PrEP before, a standard brief description of PrEP will be given before asking further questions: *The HIV prevention pill (known as 'PrEP') is a pill taken to prevent HIV. It is safe and more than 90% effective when taken every day. People who decide to use the oral HIV prevention pill need to return to their doctor every 3 months for HIV/STI testing, bloodwork, and a new prescription for the next 3 months*".<sup>1</sup>

**Table 3** Phase 2 pilot RCT study measures and timepoints of data collection

|                                          |                                                                                                                                                                                               | Week  |   |   |   |   |    |
|------------------------------------------|-----------------------------------------------------------------------------------------------------------------------------------------------------------------------------------------------|-------|---|---|---|---|----|
|                                          |                                                                                                                                                                                               | Day 1 | 2 | 4 | 6 | 8 | 12 |
| <b>Primary outcomes</b>                  |                                                                                                                                                                                               |       |   |   |   |   |    |
| PrEP use intention                       | A single bipolar scale with 7-point rating (-3 to 3)                                                                                                                                          | X     |   | X |   | X | X  |
| PrEP stages of change                    | 5 stages informed by the Transtheoretical Model of Behavioral Change (pre-contemplation, contemplation, preparation, action, & maintenance)                                                   | X     |   | X |   | X | X  |
| PrEP initiation                          | Yes/No (study record)                                                                                                                                                                         |       |   | X |   | X | X  |
| <b>Secondary outcomes</b>                |                                                                                                                                                                                               |       |   |   |   |   |    |
| PrEP knowledge                           | 5-item True/False quiz <sup>2</sup>                                                                                                                                                           | X     |   | X |   | X | X  |
| Test behavior                            | Frequency of at-home HIV/syphilis tests ( $\geq 0$ )                                                                                                                                          |       |   | X |   | X | X  |
| Willingness to pay                       | Percentage of monthly income to pay for PrEP                                                                                                                                                  | X     |   | X |   | X | X  |
| Self-report PrEP adherence***            | Daily PrEP: missed doses in past 7 days (0 to 7)<br>PrEP on-demand: occurrence of missing any dose in a single sex event and number of sex events without any PrEP coverage in the past month |       |   | X |   | X | X  |
| PrEP self-efficacy                       | 8-item scale with 5-point rating (1 to 5) <sup>2</sup>                                                                                                                                        | X     |   | X |   | X | X  |
| PrEP stigma                              | 5-item scale with 5-point rating (1 to 5) <sup>2</sup>                                                                                                                                        | X     |   | X |   | X | X  |
| PrEP attitudes                           | 5-item scale with 5-point rating (0 to 5) <sup>2</sup>                                                                                                                                        | X     |   | X |   | X | X  |
| <b>Predictor variables</b>               |                                                                                                                                                                                               |       |   |   |   |   |    |
| Intervention exposure                    | Yes/No                                                                                                                                                                                        | X     |   |   |   |   |    |
| Mini-app Engagement*                     | Self-reported frequency of app use                                                                                                                                                            |       | X | X | X | X | X  |
|                                          | Perceived app usefulness                                                                                                                                                                      |       | X | X | X | X | X  |
| <b>Covariates</b>                        |                                                                                                                                                                                               |       |   |   |   |   |    |
| Demographics & socio-economic indicators | Age, education, gender, sexual orientation, relationship status, private or shared bedroom, employment, income                                                                                | X     |   |   |   | X |    |
| Drug use                                 | Ever used recreational drugs (Yes/No)                                                                                                                                                         | X     |   |   |   |   |    |
|                                          | Drug use in the past 4 weeks                                                                                                                                                                  | X     |   | X |   | X | X  |
| Alcohol use                              | Ever consumed alcohol (Yes/No)                                                                                                                                                                | X     |   |   |   |   |    |
|                                          | Average weekly alcohol consumption, past 30 days                                                                                                                                              | X     |   | X |   | X | X  |
| Tobacco use                              | Ever consumed tobacco products (Yes/No)                                                                                                                                                       | X     |   |   |   |   |    |
|                                          | Average weekly tobacco consumption, past 30 days                                                                                                                                              | X     |   | X |   | X | X  |
| Prior HIV test history                   | Self-report HIV test history before the study (Yes/No)                                                                                                                                        | X     |   |   |   |   |    |
| HIV knowledge                            | 2-item HIV quiz                                                                                                                                                                               | X     |   | X |   | X | X  |
| HIV risk perception                      | 2 questions of perceived risk of HIV infection                                                                                                                                                | X     |   | X |   | X | X  |
| HIV-related anxiety                      | 3-item scale with 5-point rating <sup>3</sup>                                                                                                                                                 | X     |   | X |   | X | X  |
| Perceived stress                         | 4-item Cohen Perceived Stress Scale <sup>3</sup> (overall stress)                                                                                                                             | X     |   | X |   | X | X  |
| HIV-social support                       | 10-item scale with bipolar scale (-2 to 2) <sup>4</sup>                                                                                                                                       | X     |   | X |   | X | X  |
| Condomless sex                           | Occurrence of condomless sex in the past 4 weeks                                                                                                                                              | X     |   | X |   | X | X  |
| Number of sex partners                   | Self-reported number of sex partners, past 4 weeks                                                                                                                                            | X     |   | X |   | X | X  |

\*Only performed in participants in the intervention arm;

\*\* Only performed in a subgroup of participants;

\*\*\*Only performed in participants who have started using PrEP.

**Table 4** Main topics in the in-depth interview guides in Phase 2

| Topic                                                                | Description                                                                                                                    | Sample probes                                                                                                                                                                                                                                                                         |
|----------------------------------------------------------------------|--------------------------------------------------------------------------------------------------------------------------------|---------------------------------------------------------------------------------------------------------------------------------------------------------------------------------------------------------------------------------------------------------------------------------------|
| <b>HIV/STI knowledge &amp; experience</b>                            | Understanding or knowledge of HIV/STI, HIV/STI testing experience, experience with the local HIV/STI prevention & care system. | What do you know about HIV/STI?<br>What do you think about the local HIV prevention and care system?<br>What do you know about PEP and your experience with it, if any?                                                                                                               |
| <b>Health beliefs and stress due to COVID-19</b>                     | Experience of the COVID-19 pandemic and how it has influenced health beliefs and mental health                                 | What do you think about the COVID-19 pandemic has changed your thoughts of health, if any?<br>How have you been since the outbreak of COVID-19?                                                                                                                                       |
| <b>PrEP knowledge and attitudes</b>                                  | Understanding of PrEP, and attitudes, including acceptability and willingness of using PrEP to prevent HIV                     | How has your participation in this study changed your thoughts on PrEP?<br>In general, what do you think about taking medicines for health purposes? How about take medicines to prevent HIV?                                                                                         |
| <b>PrEP experience</b><br>(for participants who started PrEP )       | Narrative of PrEP using experience in this study, including perceived barriers to access, use, and manage PrEP care            | What you think are the main reasons that motivate you to initiate PrEP?<br><br>What is your experience of getting and refilling PrEP through this study?                                                                                                                              |
| <b>PrEP intention</b><br>(for participants who haven't started PrEP) | Perceived barriers or concerns of starting PrEP<br><br>Readiness to start PrEP                                                 | Would you please tell me about your concerns or things that you think are barring you from accessing PrEP?<br>How likely are you going to start PrEP in next week, next month or in near future?                                                                                      |
| <b>Mini-app using experience</b>                                     | Feedback on the mini-app design, contents and ease of use, technical problems encountered.                                     | How was your overall experience with the mini app?<br>How did you think the app meet your needs/expectations?                                                                                                                                                                         |
|                                                                      | Using experience on each of the main functions: HIV/syphilis testing, the Knowledge Center, & online counseling                | How would you describe your experience of using this feature?<br>How did you think by reading these articles have changed your health beliefs or behaviors?<br>Overall, how useful do you think this online counseling is for supporting your health, PrEP use or HIV/STI prevention? |
|                                                                      | Long-term sustainability                                                                                                       | How could you see yourself using this app in the future? Would you recommend this app to your friends?                                                                                                                                                                                |

**References:**

1. Wu Y, Xie L, Meng S, et al. Mapping Potential Pre-Exposure Prophylaxis Users onto a Motivational Cascade: Identifying Targets to Prepare for Implementation in China. *LGBT Heal.* 2019;6(5):250-260. doi:10.1089/lgbt.2018.0256
2. Walsh JL. Applying the Information–Motivation–Behavioral Skills Model to Understand PrEP Intentions and Use Among Men Who Have Sex with Men. *AIDS Behav.* 2019;23(7):1904-1916. doi:10.1007/s10461-018-2371-3
3. Nemeroff CJ, Hoyt MA, Huebner DM, Proescholdbell RJ. The Cognitive Escape Scale: measuring HIV-related thought avoidance. *AIDS Behav.* 2008;12(2):305-320. doi:10.1007/s10461-007-9345-1
4. Peterson JL, Coates TJ, Catania JA, Middleton L, Hilliard B, Hearst N. High-risk sexual behavior and condom use among gay and bisexual African- American men. *Am J Public Health.* 1992;82(11):1490-1494. doi:10.2105/AJPH.82.11.1490
